# Supplementary material for: Inhibition of HIF-1α by PX-478 enhances the anti-tumor effect of gemcitabine by inducing immunogenic cell death in pancreatic ductal adenocarcinoma
Source: PubMed Central journal article supplement (PMC4385849; doi:10.18632/oncotarget.2948), 2014-12-10
Supplement: oncotarget-06-2250-s001.pdf [file oncotarget-06-2250-s001.pdf]

# Inhibition of HIF-1 $\alpha$ by PX-478 enhances the anti-tumor effect of gemcitabine by inducing immunogenic cell death in pancreatic ductal adenocarcinoma

## Supplementary Material

**Supplementary Table 1. Antibodies and siRNA sequences**

| <b>Antibodies</b>               |                           |                       |            |       |
|---------------------------------|---------------------------|-----------------------|------------|-------|
| Name                            | Manufacturer              | Number                | Type       | Usage |
| HIF-1 $\alpha$                  | Abcam                     | ab113642              | Monoclonal | WB    |
| CRT                             | Cell Signaling Technology | 12238                 | Polyclonal | WB,IF |
| eIF2 $\alpha$                   | Cell Signaling Technology | 9722                  | Polyclonal | WB    |
| P-eIF2 $\alpha$                 | Cell Signaling Technology | 9721                  | Polyclonal | WB    |
| HMGB1                           | Sigma                     | WH0003146M8           | Monoclonal | WB,IF |
| $\beta$ -tubulin                | Abmart                    | M30109                | Monoclonal | WB    |
| <b>siRNAs sequences (5'-3')</b> |                           |                       |            |       |
| HIF-1 $\alpha$ #1               | CCAGCAGACUCAAUACAATT/     | UUGUAUUUGAGUCUGCUGGTT |            |       |
| HIF-1 $\alpha$ #2               | GCCUCUUUGACAAACUUAATT/    | UUAAGUUUGUCAAGAGGCTT  |            |       |
| HIF-1 $\alpha$ #3               | CAGGCCACAUUCACGUAUATT/    | UAUACGUGAAUGUGGCCUGTT |            |       |

WB: Western blotting; IF:Immunofluorescence

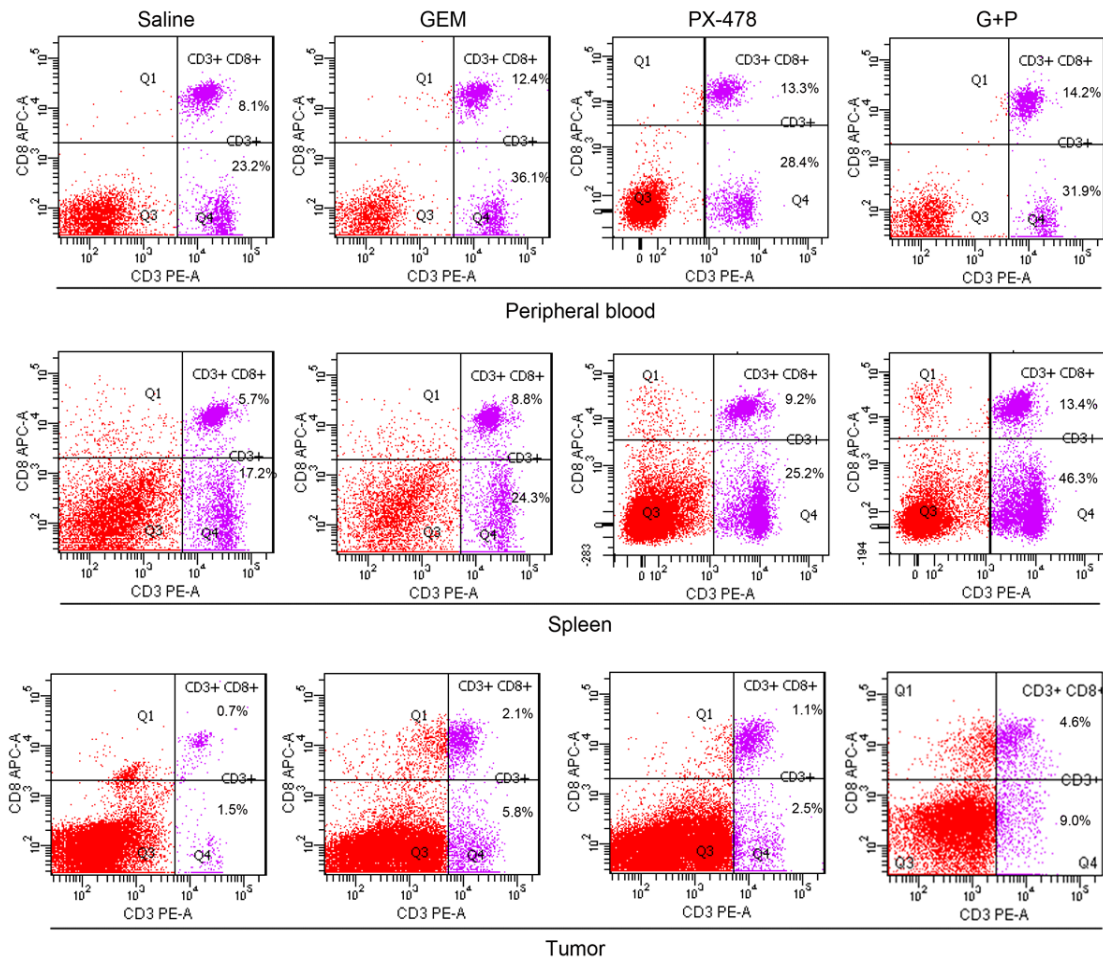

**Supplementary figure1:** The figures of CD8<sup>+</sup> and CD3<sup>+</sup> T cells isolated from peripheral blood, spleen and tumour were analyzed by flow cytometry.
